# Supplementary material for: Predicting cognition after subthalamic Deep Brain Stimulation in Parkinson’s Disease
Source: Research Square preprint supplement (doi:10.21203/rs.3.rs-6973225/v1), 2025-07-03
Supplement: Supplementary file 1 [file 95149719655055e8ef70a4a5.docx]

**CANTAB ConnectTM cognitive test battery**

The Motor Screening Task (MOT) serves as a pretest introducing and checking the handling of the tablet screen. In the Reaction Time test (RTI), patients must press buttons as fast as possible. Whereas in the simple trials, there is only one button that is always presented at the same location, five different buttons serve as cues in the advanced trials. The Pattern Recognition Memory test (PRM) assesses visual learning in an immediate and delayed recognition phase. Patients must identify a previously presented abstract pattern out of two choices. In the Paired Associates Learning task (PAL), visual learning is tested in combination with spatial memory. After different patterns have been displayed in different locations on the screen, patients must memorize the location of the pattern presented later during the trial. The Spatial Span task (SSP) is a digitalized version of the Corsi block span assessing visuospatial working memory. Patients are asked to remember and reproduce a spatial time sequence both in the same order as presented and backwards. The number of items in the longest correct sequence is called span. In the Verbal Recognition Memory test (VRM), verbal learning is assessed. There is a free recall condition without cues and an immediate and delayed recognition condition where every previously learned word must be discriminated from another word. In the Multitasking Test (MTT), conflicting stimuli must be integrated by shifting the focus of attention: Patients are asked point to either the side or the direction of an arrow presented at the screen while ignoring stimuli irrelevant to the task. In the Spatial Working Memory test (SWM), patients must find and memorize specific stimuli with an increasing number of possibilities. The Emotion Recognition task (ERT) measures the ability to infer emotions from facial expressions in a multiple-choice paradigm.
